# Supplementary material for: Enhancing intrinsic motivation for physical activity among adolescents with cystic fibrosis: a qualitative study of the views of healthcare professionals
Source: PubMed Central journal article supplement — BMJ Open. 2019 Jun 14;9(6):e028996. doi: 10.1136/bmjopen-2019-028996 (PMC6575634; doi:10.1136/bmjopen-2019-028996), 2019-06-14
Supplement: bmjopen-2019-028996supp001.pdf [file bmjopen-2019-028996supp001.pdf]

## Supplement 1: Semi structured interview schedule

1. How important do you think physical activity is for adolescents with CF?
  - a. Why?
2. Who should be promoting physical activity for adolescents with CF?
3. What do you think the biggest barriers are to adolescents with CF being physically active?
  - a. How would you help them overcome this?
4. How do you encourage adolescents to be physically active?
  - a. What information or issues do you consider when promoting physical activity?
  - b. How do you encourage those who are not motivated?
  - c. How effective do you think these approaches are? Why?
5. Can you give me an example of how you encourage adolescents to be physically active?
6. In which situations / for which patients (if any) are you least likely to promote PA?
  - a. Why?
7. Is there anything you feel you need to improve physical activity promotion?
  - a. Is there any more information / training that would be useful?
8. Would any organisational or cultural changes facilitate the promotion of physical activity?
9. Is there anything else you want to say?
